# Supplementary material
Source: PubMed Central journal article supplement (PMC3633684)

1 **Supporting Information**

2  
3 **The adhesive and cohesive properties of a bacterial polysaccharide adhesin are modulated by a**  
4 **deacetylase.**

5  
6 Zhe Wan, Pamela J.B. Brown<sup>1</sup>, Ellen N. Elliott<sup>2</sup>, and Yves V. Brun\*

7  
8 Department of Biology, Indiana University, Bloomington, IN 47405, USA.

9  
10 \*Corresponding author. Mailing address: Department of Biology, Indiana University, 1001 E. 3<sup>rd</sup> St.,  
11 Bloomington, Indiana 47405, USA. Phone: 812-855-8860. Fax: 812-855-6705. Email:  
12 [ybrun@indiana.edu](mailto:ybrun@indiana.edu).

13  
14 1. Current address: Division of Biological Sciences, University of Missouri, 105 Tucker Hall,  
15 Columbia, MO 65211-7400

16 2. Current address: University of Pennsylvania School of Medicine, 12-165 Translational Research Center, 3400  
17 Civic Center Boulevard, Philadelphia, PA 19104, USA

## 1 SUPPORTING EXPERIMENTAL PROCEDURES

2

### 3 **Formic acid treatment of HfaA and HfsD samples.**

4

5 Cell fractionation and protein analysis were performed as previously described (Hardy *et al.*,  
6 2010). Cell pellets from 20 ml of exponentially growing cells normalized to OD<sub>600</sub>= 0.6 were  
7 resuspended in 1 ml of 20 mM Tris buffer pH = 8 suspended, and lysed by FastPrep®-24 Instrument  
8 (MP Biomedicals LLC) in 2.0 ml Lysing Matrix tube containing specialized Lysing Matrix beads for  
9 45 sec. Unbroken cells were removed by centrifugation at 16,000 g at 4°C for 2 min. The supernatant  
10 was removed and centrifuged at 100,000 x g at 4°C for 30 min. The pellet was suspended in 500 µl 20  
11 mM Tris, pH 8.0 and 1% sodium lauryl sarcosine, rocked at RT for 45 min, and centrifuged at 100,000  
12 x g for 30 min. The pellet comprises the OM fraction which contains HfaA and HfaD and was treated  
13 with 90% formic acid for 2h at room temperature at dark prior to analysis by SDS-PAGE. After  
14 incubation with formic acid, all samples were lyophilized until dry. Two volumes of deionized water  
15 were added to each formic acid sample, which was lyophilized again to remove traces of formic acid.  
16 Samples were suspended in equal volumes of 1 M Tris, pH 8 and 2X SDS-PAGE sample buffer (0.125  
17 M Tris, 4% w/v SDS, 25% v/v glycerol, 4% w/v dithiothreitol, 10% v/v β-mercaptoethanol, and 0.2%  
18 w/v bromophenol blue) and boiled for 5 min prior to electrophoresis where each loaded sample was  
19 equivalent to 25 ml cell culture at OD<sub>600</sub>=0.6.

20

### 21 **Western Blot Analysis**

22

23 Protein samples were resuspended in 50 µl 10 mM Tris pH 8.0, and 50 uL of 2x SDS sample buffer  
24 was added to the suspension. Samples were then boiled for 5 min before being run on a 12% w/v  
25 polyacrylamide gel, and transferred to nitrocellulose membranes. Membranes were blocked for 1 h in

1 5% w/v nonfat dry milk in TBST (20 mM Tris, pH 8, 0.05% v/v Tween 20), and incubated with M2-  
2 HRP at a concentration of 1:1000 overnight at 4°C. Then, a 1:10,000 dilution of secondary antibody,  
3 horseradish peroxidase (HRP)-conjugated goat anti-rabbit immunoglobulin, was incubated with  
4 membranes at room temperature for 1h. Membranes were developed with SuperSignal West Dura  
5 Substrate (Thermo Scientific, Rockford, IL).

6

### 7 **Epifluorescence microscopy and image analysis**

8

9 Microscopy was performed on a Nikon Eclipse 90i equipped with Chroma 83000 filter set, a 100X  
10 (DIC or phase-contrast) oil objective, and a Photometrics Cascade 1K EMCCD camera. Images were  
11 captured using Nikon NIS Elements advance research version 4.0

12

### 13 **Cell fractionation and protein analysis.**

14

15 Cell pellets from 20 ml of exponentially growing cells normalized to  $OD_{600} = 0.6$  were resuspended in  
16 1 ml of 20 mM Tris buffer pH = 8 suspended, and lysed by FastPrep®-24 Instrument (MP Biomedicals  
17 LLC) in 2.0 ml Lysing Matrix tube containing specialized Lysing Matrix beads for 45 sec. Unbroken  
18 cells were removed by centrifugation at 16,000 x g at 4°C for 2 min. The supernatant was removed and  
19 centrifuged at 100,000 x g at 4°C for 30 min. The supernatant containing the soluble proteins and the  
20 pellet containing the insoluble membrane proteins were stored at -80°C.

21

1 **SUPPORTING TABLES**

2

3 **Table S1.** Comparison of the genes involved in holdfast biosynthesis in *C. crescentus* and their  
 4 homologs in close relatives of *Caulobacter*.

| <i>C. crescentus</i><br>CB15 |                                                    | <i>A. biprosthicum</i><br>C19 |           | <i>H. baltica</i> |           | <i>B. diminuta</i> |           |
|------------------------------|----------------------------------------------------|-------------------------------|-----------|-------------------|-----------|--------------------|-----------|
| Holdfast gene                | Predicted gene function                            | Locus tag                     | % Ident.* | Locus tag         | % Ident.* | Locus tag          | % Ident.* |
| <i>hfsE</i> (CC2425)         | Glycosyltransferase                                | NA**                          | 53        | NA**              | 43        | 1681               | 49        |
| <i>hfsF</i> (CC2426)         | Flippase                                           | 42660                         | 46        | 100               | 37        | 17320              | 52        |
| <i>hfsG</i> (CC2427)         | Glycosyltransferase                                | 42650                         | 59        | 1964              | 41        | 17330              | 60        |
| <i>hfsH</i> (CC2428)         | Polysaccharide deacetylase family protein          | 42640                         | 51        | 1965              | 33        | 22530              | 37        |
| <i>hfsC</i> (CC2429)         | Polysaccharide polymerase                          | 42530                         | 45        | 1972              | 31        | 18490              | 43        |
| <i>hfsB</i> (CC2430)         | Polysaccharide autokinase-related protein          | 42620                         | 44        | 1967              | 37        | 17340              | 47        |
| <i>hfsA</i> (CC2431)         | Chain length determinant family protein            | 42610                         | 41        | 1968              | 34        | 17350              | 42        |
| <i>hfsD</i> (CC2432)         | Polysaccharide biosynthesis/export family proteins | 42600                         | 50        | 1969              | 41        | 17360              | 49        |

5

6 \* Gene is found in the region without annotation.

7 \*\* % identity to gene homolog in *C. crescentus* CB15.

8

1

2 **TABLE S2.** Bacterial strains and plasmids

|                         | Derivation/phenotype/genotype                                                                                                                        | Reference/Source                |
|-------------------------|------------------------------------------------------------------------------------------------------------------------------------------------------|---------------------------------|
| <i>E. coli</i>          |                                                                                                                                                      |                                 |
| Alpha select            | F- <i>deoR endA1 recA1 relA1 gyrA96 hsdR17</i> (rk-, mk+) <i>supE44 thi-1</i><br><i>phoAΔ</i> ( <i>lacZYAargF</i> )U169 $\phi$ 80 <i>lacZΔM15 λ-</i> | Bioline                         |
| BL21(DE3)               | F- <i>ompT hsdSB</i> (rB-mB-) <i>gal dcm</i> ( $\lambda$ DE3)                                                                                        |                                 |
| <i>C. crescentus</i>    |                                                                                                                                                      |                                 |
| YB135                   | CB15 wild-type                                                                                                                                       | (Poindexter, 1964)              |
| YB2857                  | CB15 $\Delta$ <i>hfsDAB</i>                                                                                                                          | Brun lab                        |
| YB6364                  | CB15 $\Delta$ <i>hfsD-E</i>                                                                                                                          | June Javens                     |
| YB2198                  | CB15 $\Delta$ <i>hfsH</i>                                                                                                                            | Toh <i>et al.</i> , 2008        |
| YB4251                  | CB15 $\Delta$ <i>hfaB</i>                                                                                                                            | Hardy <i>et al.</i> , 2010      |
| YB4284                  | CB15 <i>hfaB</i> ::pCHYChfaAB                                                                                                                        | Hardy <i>et al.</i> , 2010      |
| YB6886                  | CB15 $\Delta$ <i>hfsH hfaB</i> ::pCHYChfaAB                                                                                                          | This work                       |
| YB2578                  | CB15 <i>hfaA</i> ::pJM23 <i>hfaA</i>                                                                                                                 | Brun lab                        |
| YB5622                  | CB15 $\Delta$ <i>hfsH hfaA</i> ::pJM23 <i>hfaA</i>                                                                                                   | This work                       |
| YB2579                  | CB15 <i>hfaD</i> ::pJM23 <i>hfaD</i>                                                                                                                 | Brun lab                        |
| YB5624                  | CB15 $\Delta$ <i>hfsH hfaD</i> ::pJM23 <i>hfaD</i>                                                                                                   | This work                       |
| YB6887                  | CB15 $\Delta$ <i>hfsH</i> pMR10 <i>hfsH</i>                                                                                                          | This work                       |
| YB6888                  | CB15 $\Delta$ <i>hfsH</i> pMR10 <i>hfsH</i> -D48A                                                                                                    | This work                       |
| <i>A. biprosthicum</i>  |                                                                                                                                                      |                                 |
| YB642                   | C19 wild type                                                                                                                                        | (Larson and Pate, 1975)         |
| YB5191                  | C19nal; parent strain of transposon mutants                                                                                                          | This study                      |
| YB5649                  | C19nal <i>hfsH</i> ::MarTn                                                                                                                           | This study                      |
| YB5650                  | C19nal <i>hfsE</i> ::MarTn                                                                                                                           | This study                      |
| YB5651                  | C19nal <i>hfsA</i> ::MarTn                                                                                                                           | This study                      |
| YB6593                  | C19nal <i>hfsD</i> ::MarTn                                                                                                                           | This study                      |
| <i>Hirschia baltica</i> |                                                                                                                                                      |                                 |
| YB5842                  | ATCC49814                                                                                                                                            | (Chertkov <i>et al.</i> , 2011) |

*Brevundimonas diminuta*

YB5193 ATCC11568

*Plasmids*

|                        |                                                                                                                                                 |                              |
|------------------------|-------------------------------------------------------------------------------------------------------------------------------------------------|------------------------------|
| pET28a <i>hfsH</i>     | Protein overexpression vector that carries the <i>hfsH</i> gene                                                                                 | This work                    |
| pET28a <i>hfsHD48A</i> | Protein overexpression vector that carries the <i>hfsH</i> gene with single amino acid mutation from Asp48 to Ala.                              | This work                    |
| pMR10                  | shuttle plasmid for <i>E. coli</i> and <i>Caulobacter</i> , Km <sup>R</sup>                                                                     | Roberts <i>et al.</i> , 1996 |
| pMR10 <i>hfsH</i>      | Complementation vector that carries the native <i>hfsE</i> promoter and the <i>hfsH</i> gene                                                    | Toh <i>et al.</i> , 2008     |
| pMR10 <i>hfsHD48A</i>  | Complementation vector that carries the native <i>hfsE</i> promoter and the <i>hfsH</i> gene with single amino acid mutation from Asp48 to Ala. | This study                   |
| pUJ142                 | High copy number plasmid that is a derivative of pBBR1MCS with a xylose inducible promoter. Cm <sup>R</sup>                                     | U. Jenal, unpublished        |
| pUJ142 <i>hfsH</i>     | Complementation vector that carries the <i>hfsH</i> gene                                                                                        | This study                   |

---

1

2

3

## 1 SUPPORTING FIGURE LEGENDS

2

3 **Figure S1.** Alignment of *C. crescentus* HfsH and *A. biprosthicum* HfsH along with biochemically  
4 characterized CE4 esterase family members. The conserved motifs are indicated by squares. Motif 2  
5 (black box) contains the zinc binding triad. The conserved acetate binding residues (blue triangles) are  
6 required for enzymatic activity and include the site of the point mutation (blue star). From the top to  
7 the bottom, the polysaccharide deacetylases compared are as follows: *C. crescentus* CB15 HfsH  
8 (accession number AAK24399.1), *A. biprosthicum* HfsH (accession number AAK24399.1),  
9 *Streptococcus pneumonia* PgdA (accession number CAB96552.1), *Bacillus subtilis* PdaA (accession  
10 number O34928.1), and *Colletotrichum lindemuthianum* CDA (accession number AY63365).

11

12 **Figure S2.** Circular dichroism spectra of wild-type HfsH-WT(wild-type) (pink) and HfsH-D48A  
13 (green) in 50 mM sodium phosphate pH 7.4. Samples have a concentration of 0.17 mg ml<sup>-1</sup>, and were  
14 measured in a 0.1-cm cell.

15

16 **Figure S3.** Analysis of holdfast anchoring machinery in a  $\Delta hfsH$  mutant. (A) Western Blots of outer  
17 membrane fractions. HfaA forms SDS/heat high-molecular weight (HMW) complexes in wild-type  
18 (WT) and  $\Delta hfsH$  mutant cells expressing HfaA-M2 or HfaD-M2, and these HMW complexes  
19 disassociate into monomers after formic acid (FA) treatment. Blots were probed with M2-specific  
20 antibody. Lane 1) CB15 wild-type (WT) treated with SDS and heat; 2) CB15 treated with SDS, heat  
21 and formic acid; Lane 3)  $\Delta hfsH$  wild-type treated with SDS and heat; 4)  $\Delta hfsH$  treated with SDS, heat  
22 and formic acid; (B) HfaD forms HMW complexes in wild-type and  $\Delta hfsH$  mutant cells. Blots are  
23 arranged in the same order as (A). (C) Overlay micrographs of differential interference contrast (DIC)  
24 and epifluorescence microscopy showing the localization of HfaBmCherry. The left panel is CB15

1 *hfaB::pCHYChfaAB*, and the right panel is CB15  $\Delta$ *hfsH hfaB::pCHYChfaAB*. The localization of  
2 HfaBmCherry (in red) is indicated by white arrows.

3

4 **Figure S4.** HfsH localizes to the soluble fraction of cells. Total whole cells (WC) were separated into  
5 soluble fraction (Soluble) and insoluble membrane fraction (Insoluble) fraction. McpA (membrane  
6 positive control), and CtrA (soluble fraction positive control) are shown.

7

8

9

10



1 **SUPPORTING REFERENCES**

2  
3  
4  
5  
6  
7  
8  
9  
10  
11  
12  
13  
14  
15  
16

Chertkov, O., P. J. Brown, D. T. Kysela, M. A. de Pedro, S. Lucas, A. Copeland, A. Lapidus, T. G. Del Rio, H. Tice, D. Bruce, L. Goodwin, S. Pitluck, J. C. Detter, C. Han, F. Larimer, Y. J. Chang, C. D. Jeffries, M. Land, L. Hauser, N. C. Kyrpides, N. Ivanova, G. Ovchinnikova, B. J. Tindall, M. Goker, H. P. Klenk & Y. V. Brun, (2011) Complete genome sequence of *Hirschia baltica* type strain (IFAM 1418(T)). *Standards in genomic sciences* **5**: 287-297.

Hardy, G. G., R. C. Allen, E. Toh, M. Long, P. J. B. Brown, J. L. Cole-Tobian & Y. V. Brun, (2010) A localized multimeric anchor attaches the Caulobacter holdfast to the cell pole. *Mol Microbiol* **76**: 409-427.

Larson, R. J. & J. L. Pate, (1975) Growth and morphology of *Asticcacaulis biprosthhecum* in defined media. *Arch Microbiol* **106**: 147–157.

Poindexter, J. S., (1964) Biological Properties and Classification of the Caulobacter Group. *Bacteriological reviews* **28**: 231-295.

Fig. S1

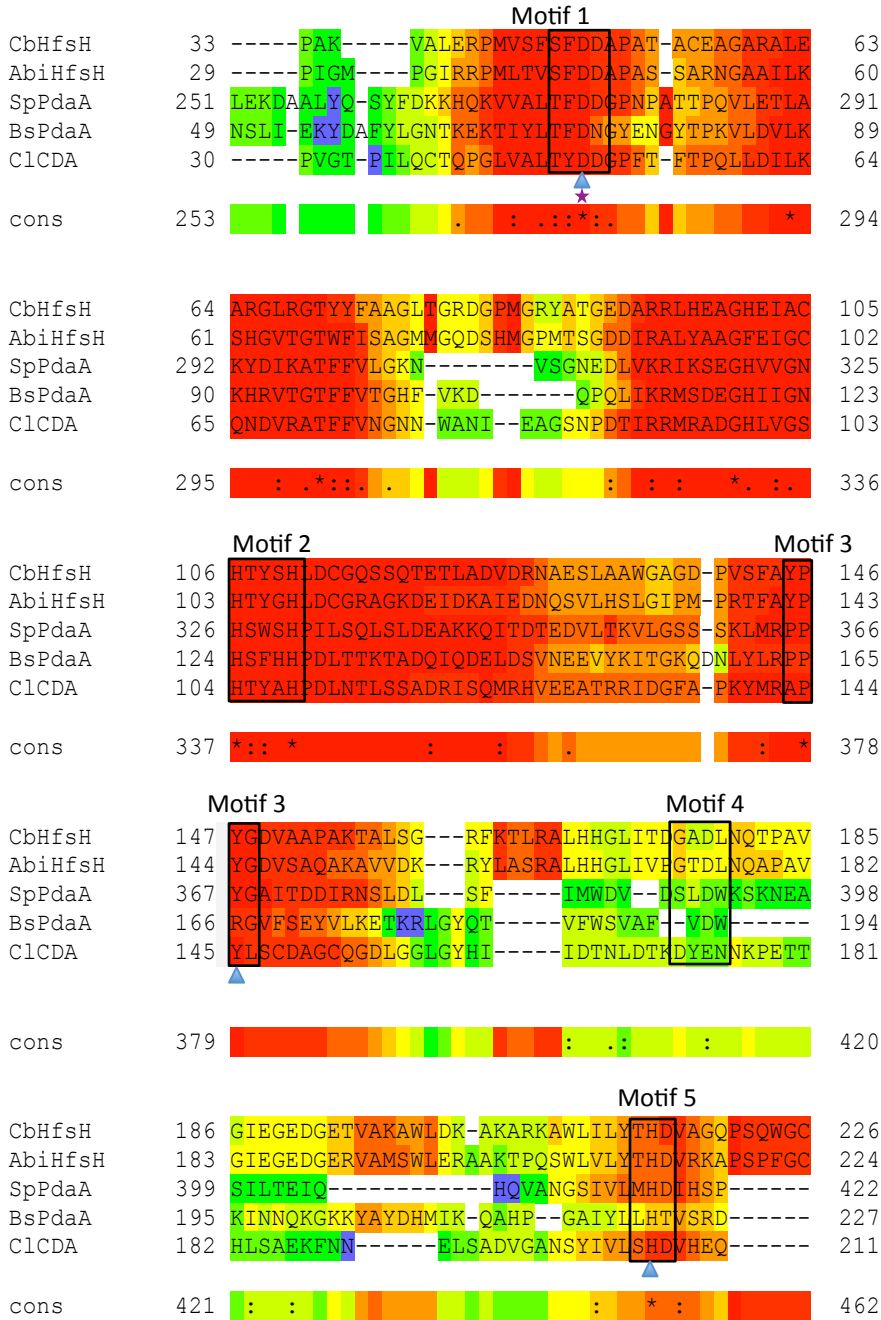

Fig. S2

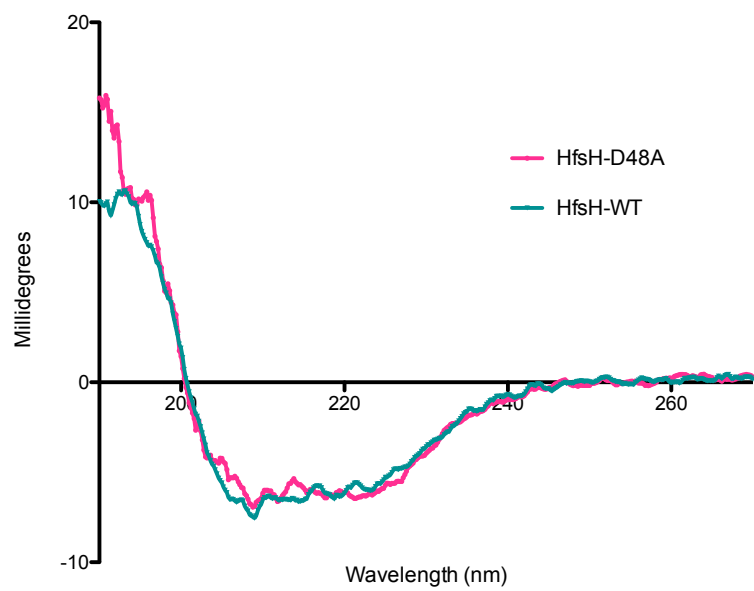

Fig. S3

A.

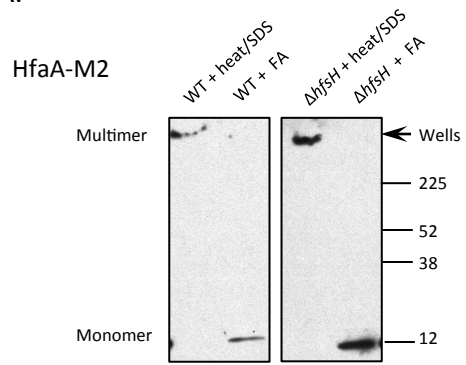

B.

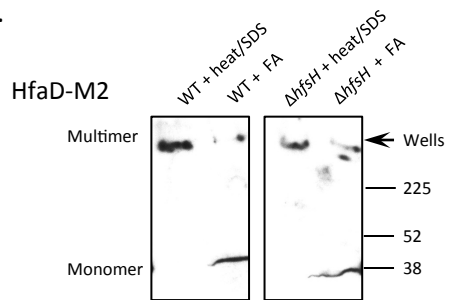

C.

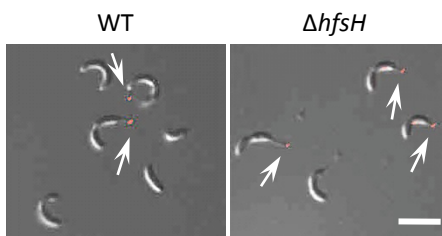

Fig. S4

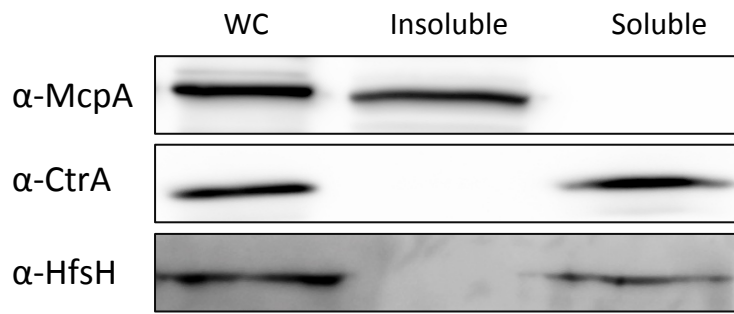

Supplement: NIHMS453278-supplement-Supp_Material.pdf [file NIHMS453278-supplement-Supp_Material.pdf]
